# Supplementary material for: CH4 activation and C–C coupling on the Ti2C(100) surface in the presence of intrinsic C-vacancies: is excess good?
Source: Royal Society of Chemistry journal article supplement (doi:10.1039/d1ta00626f), 2021-01-01
Supplement: d1ta00626f1.pdf [file d1ta00626f1.pdf]

**Supplementary Material: CH<sub>4</sub> Activation and C-C coupling on Ti<sub>2</sub>C(100) Surface in presence of intrinsic C-vacancies: Is excess good?**

Nishamol Kuriakose,<sup>1, a)</sup> Unmesh Mondal,<sup>2, b)</sup> and Prasenjit Ghosh<sup>3, c)</sup>

<sup>1)</sup>*Dept. of Physics, Indian Institute of Science Education and Research,  
Dr. Homi Bhabha Road, Pune-411008, India*

<sup>2)</sup>*Dept. of Chemistry, Indian Institute of Science Education and Research,  
Dr. Homi Bhabha Road, Pune-411008, India*

<sup>3)</sup>*Department of Physics, Centre for Energy Science, Indian Institute of  
Science Education and Research (IISER), Pune 411008, Maharashtra ,  
India*

---

<sup>a)</sup>Electronic mail: nishamol.kuriakose1@gmail.com

<sup>b)</sup>Electronic mail: unmesh.mondal@students.iiserpune.ac.in

<sup>c)</sup>Electronic mail: pghosh@iiserpune.ac.in

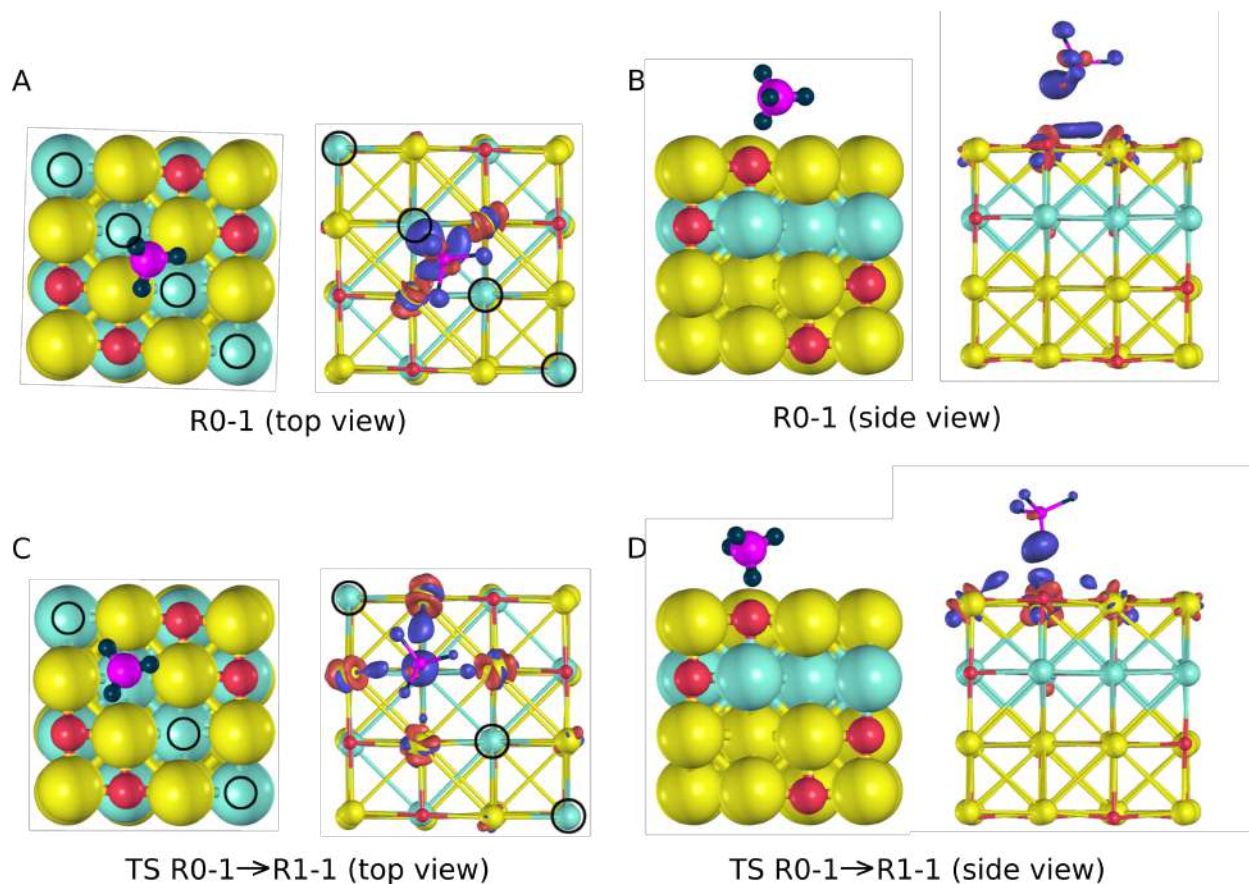

FIG. S1. Top and side views of the initial state (R0-1; upper panel) and transition state R0-1  $\rightarrow$  R1-1 (lower panel) of the first CH bond activation of  $\text{CH}_4$ . Also shown are the charge density isosurfaces (blue denotes charge depletion and red denotes charge accumulation). While in the initial state, methane interacts with two Ti atoms on the surface, in the transition state it interacts with four Ti atoms surrounding the vacancy.

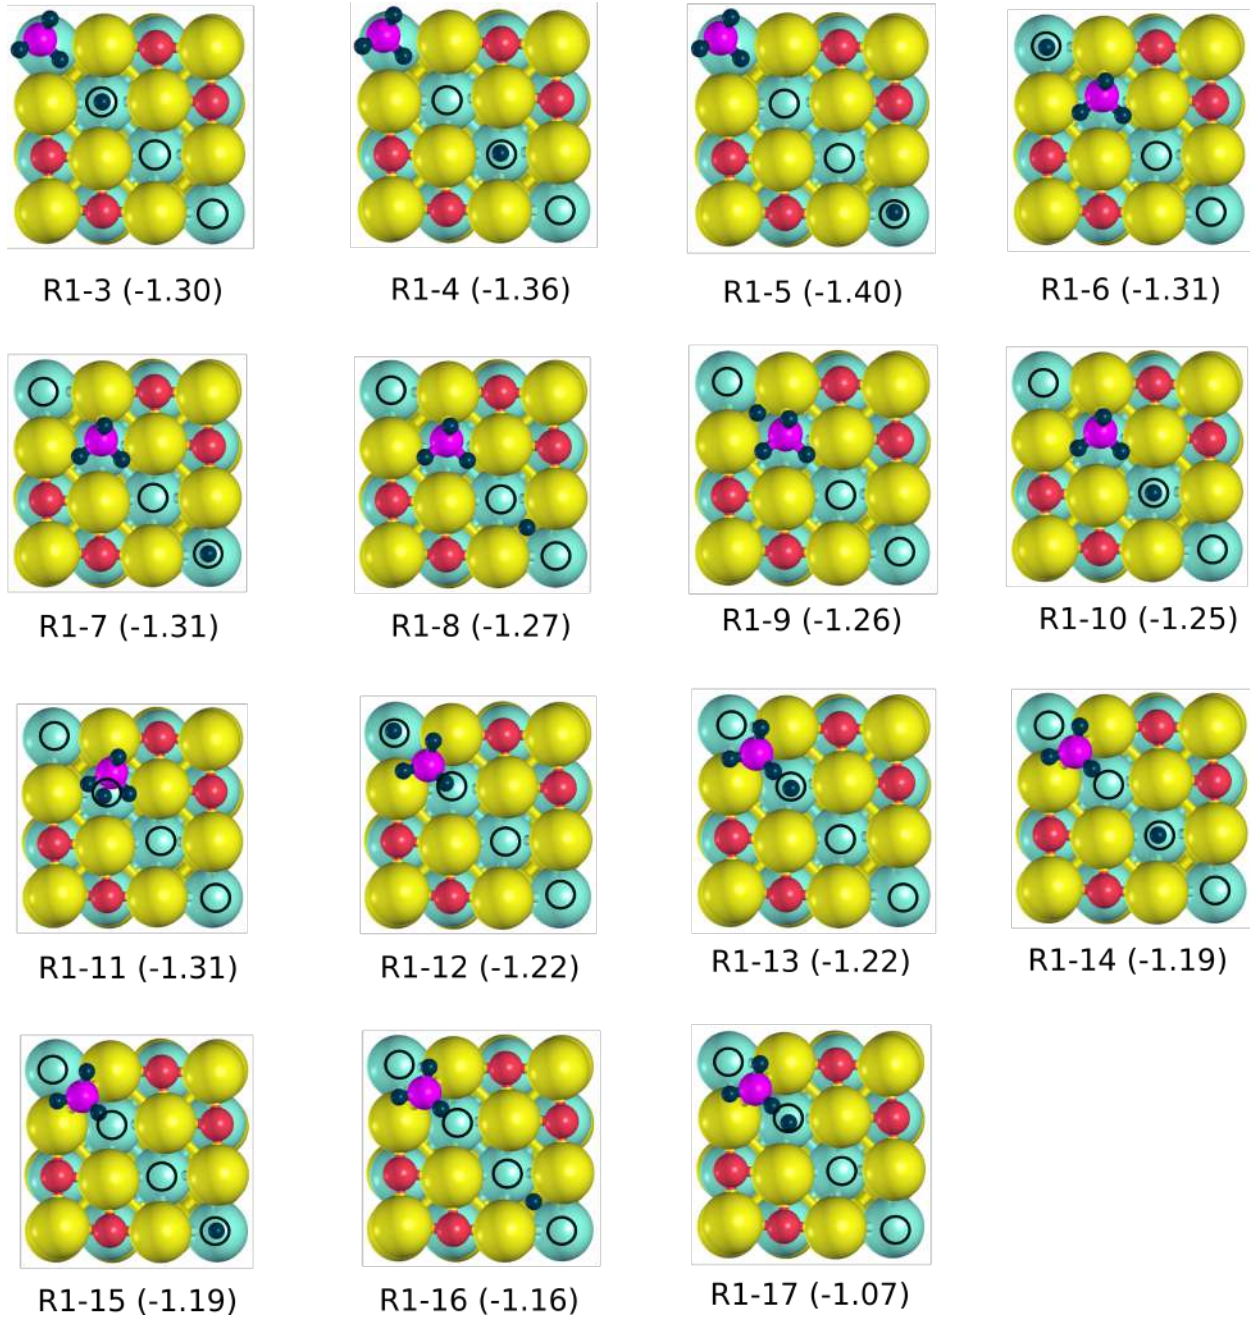

FIG. S2. Relaxed configurations of  $\text{Ti}_2\text{C}(100)$  surface with  $\text{CH}_3$  and H. The energies in parenthesis are the co-adsorption energies of the species adsorbed on the surface with respect to the clean surface and methane in gas phase. The energies are given in eV.

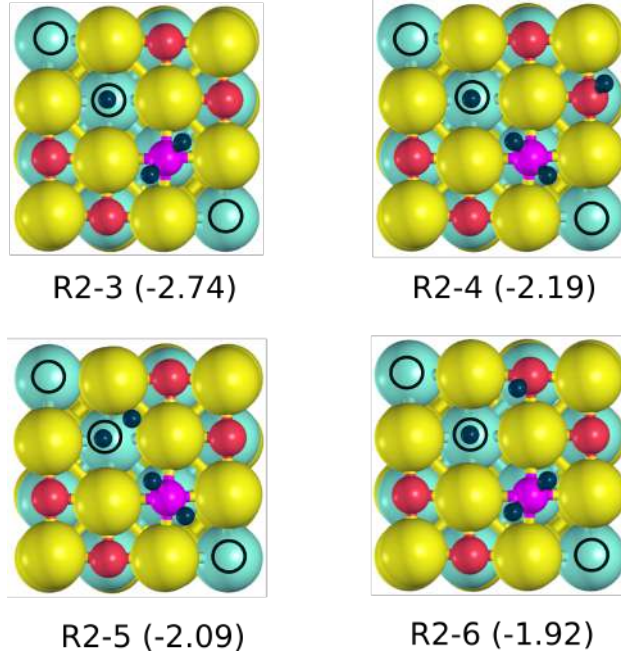

FIG. S3. Relaxed configurations of  $\text{Ti}_2\text{C}(100)$  surface with  $\text{CH}_2$  and  $2\text{H}$ . The energies in parenthesis are the co-adsorption energies of the species adsorbed on the surface with respect to the clean surface and methane in gas phase. The energies are given in eV.

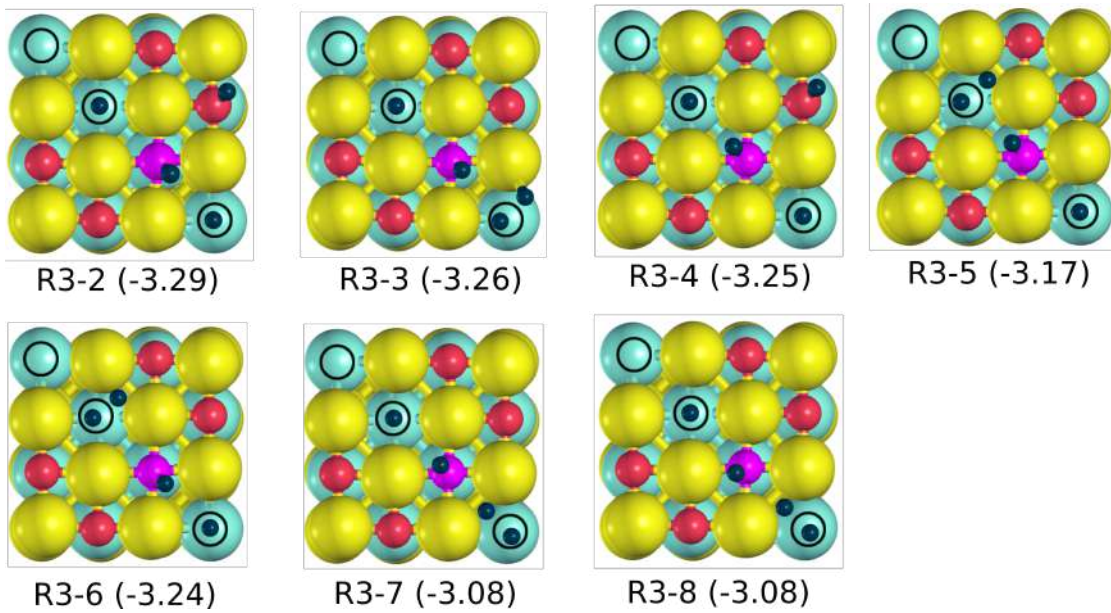

FIG. S4. The relaxed geometries of the final state corresponding to CH formation (reaction R3). The numbers given in parenthesis are the co-adsorption energies of the species adsorbed on the surface with respect to the clean surface and methane in gas phase. The energies are given in eV.

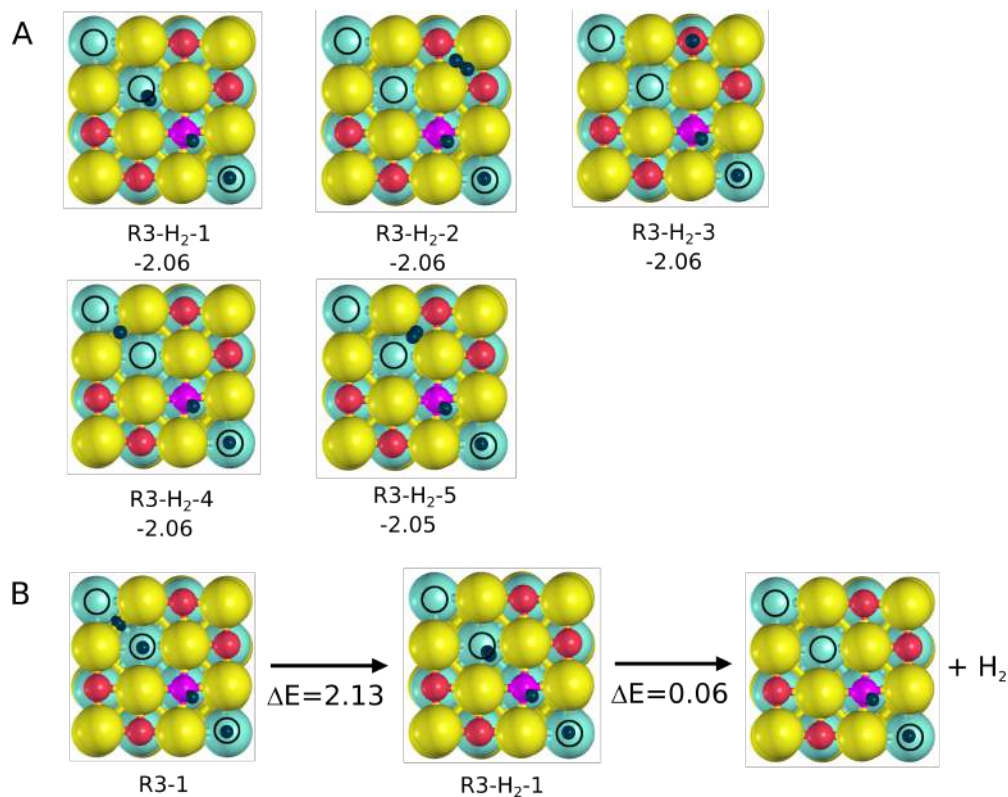

FIG. S5. (A) The different configurations for adsorption of molecular H<sub>2</sub> in presence of CH and H on Ti<sub>2</sub>C(100) surface. (B) The reaction energies for the formation of molecular H<sub>2</sub> from R3-1. The energies are given in eV.

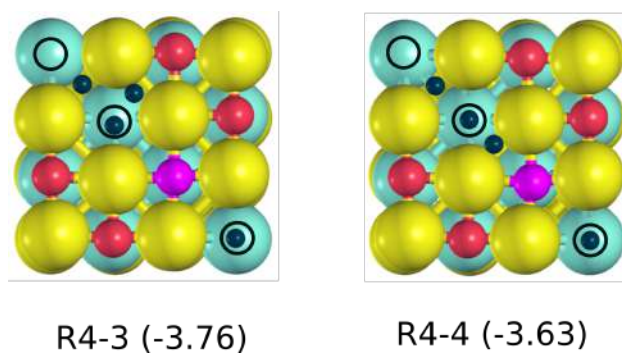

FIG. S6. Relaxed configurations of Ti<sub>2</sub>C(100) surface with C and 4H. The energies in parenthesis are the co-adsorption energies of the species adsorbed on the surface with respect to the clean surface and methane in gas phase. The energies are given in eV.

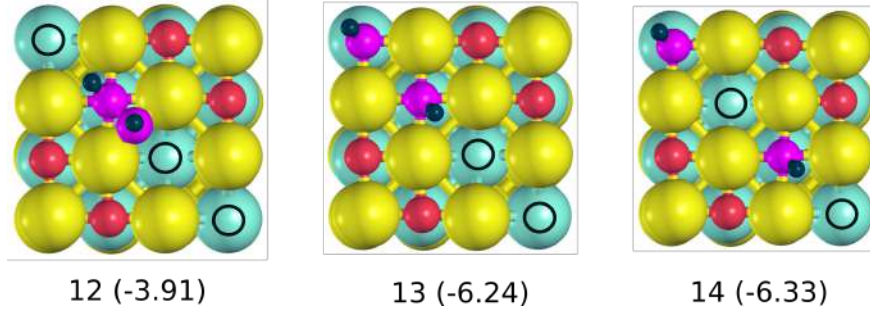

FIG. S7. Relaxed configurations of  $\text{Ti}_2\text{C}(100)$  surface with two CH fragments and  $\text{C}_2\text{H}_2$ . The energies in parenthesis are the co-adsorption energies of the species adsorbed on the surface with respect to the clean surface and acetylene in gas phase. The energies are given in eV.

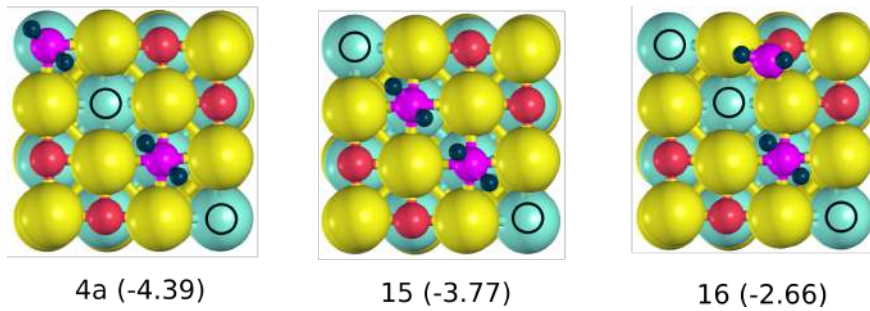

FIG. S8. Relaxed configurations of  $\text{Ti}_2\text{C}(100)$  surface with two  $\text{C}_2\text{H}_2$  fragments. The energies in parenthesis are the co-adsorption energies of the species adsorbed on the surface with respect to the clean surface and ethylene in gas phase. The energies are given in eV.

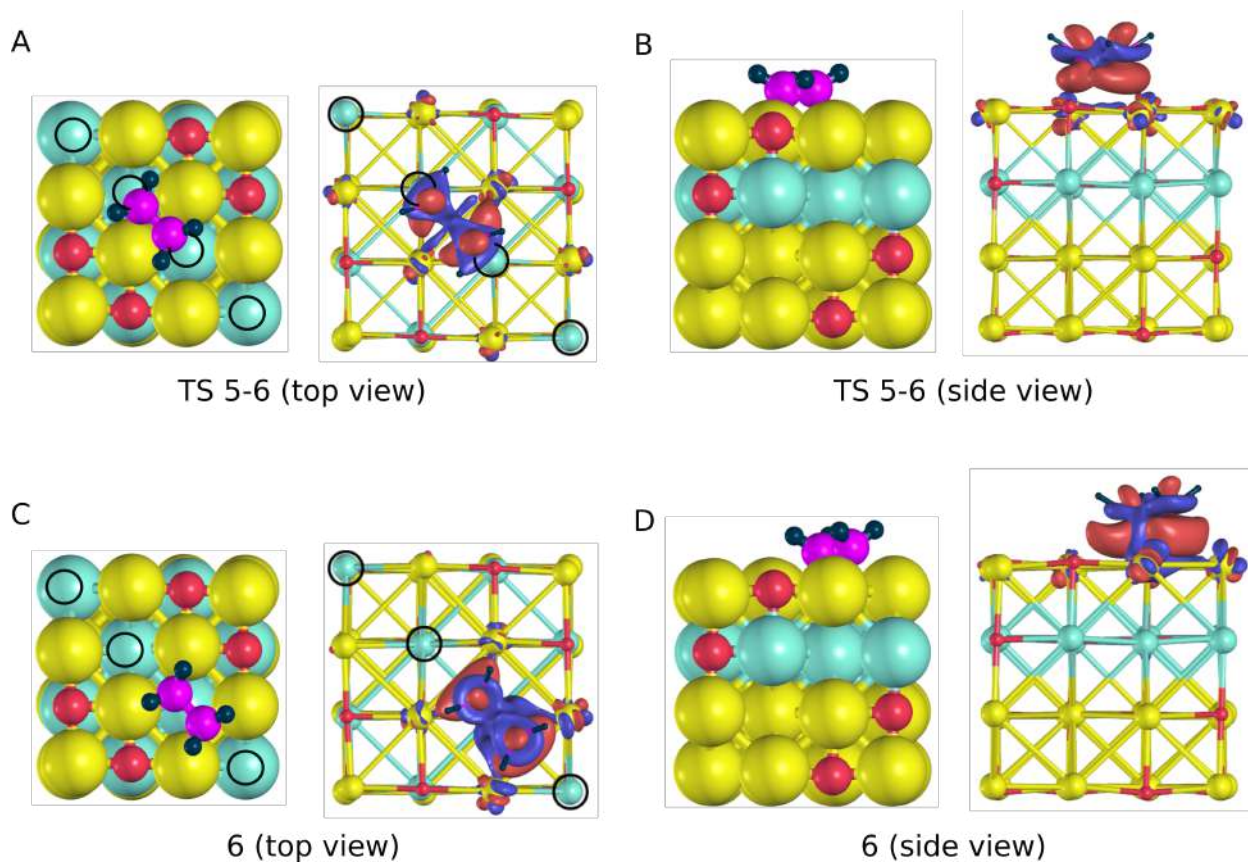

FIG. S9. Top panel: top (A) and side (B) views of the transition state corresponding to the  $C_2H_4$  formation, **TS 5-6**. Bottom panel: top (C) and side (D) views of the final state corresponding to the  $C_2H_4$  formation, **6**. Also shown are the charge transfer isosurfaces. The red (blue) isosurfaces corresponds to charge accumulation (depletion).

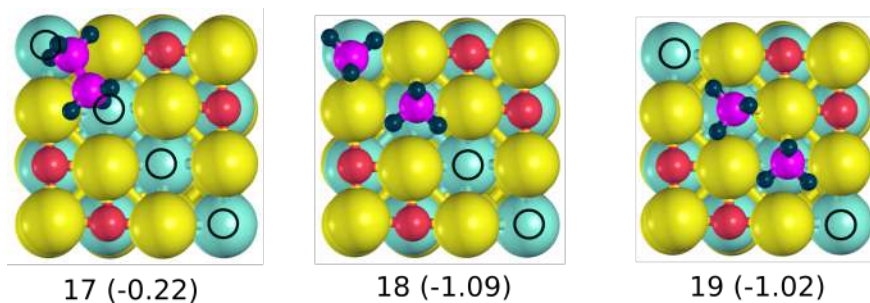

FIG. S10. Relaxed configurations of  $Ti_2C(100)$  surface with two  $CH_3$  fragments and  $C_2H_6$ . The energies in parenthesis are the co-adsorption energies of the species adsorbed on the surface with respect to the clean surface and ethane in gas phase. The energies are given in eV.

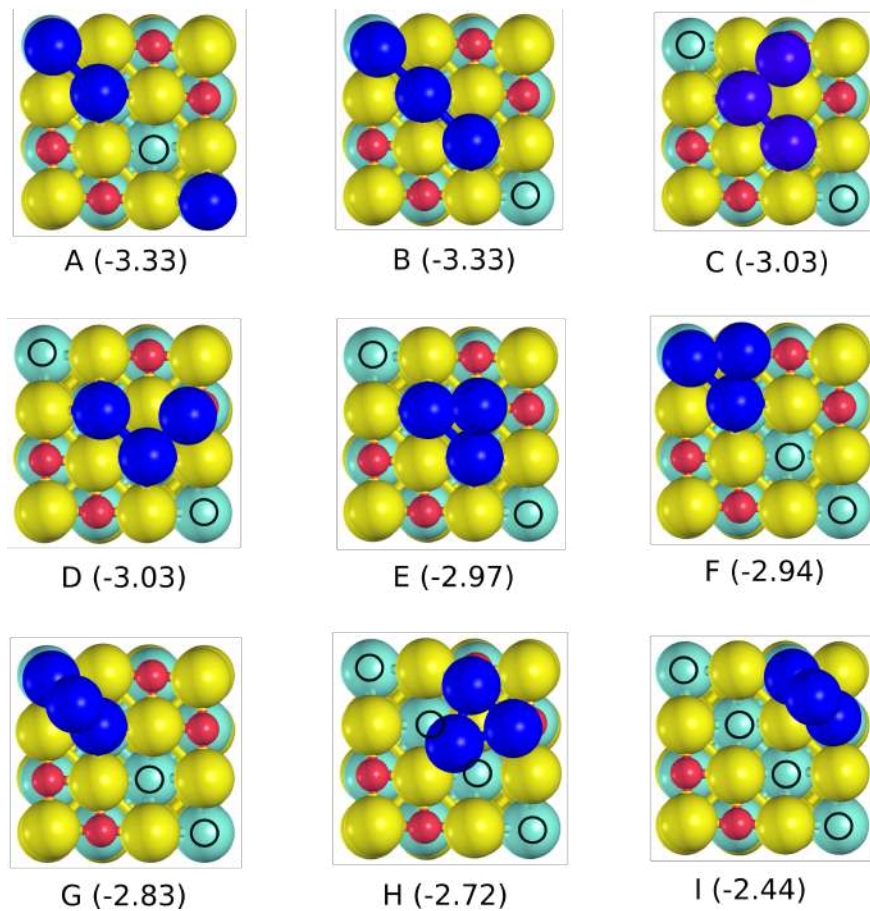

FIG. S11. Relaxed configurations of  $\text{Ti}_2\text{C}(100)$  surface with  $\text{Cu}_3$  cluster. The energies in parenthesis are the adsorption energies per Cu atom (blue spheres) of the species adsorbed on the surface with respect to the clean surface and  $\text{Cu}_3$  in gas phase. The energies are given in eV.
